# Supplementary material for: MD Simulation Reveals Regulation of Mechanical Force and Extracellular Domain 2 on Binding of DNAM-1 to CD155
Source: MDPI journal article supplement (doi:10.3390/molecules28062847), 2023-03-21
Supplement: s1 [file s1]

Supplementary Materials

# MD Simulation Reveals Regulation of Mechanical Force and Extracellular Domain 2 on Binding of DNAM-1 to CD155

Liping Fang, Yang Zhao, Pei Guo, Ying Fang\* and Jianhua Wu\*

Institute of Biomechanics/School of Biology and Biological Engineering, South China University of Technology, Guangzhou 510006, China

\* Correspondence: yfang@scut.edu.cn (Y.F.); wujianhua@scut.edu.cn (J.W.)

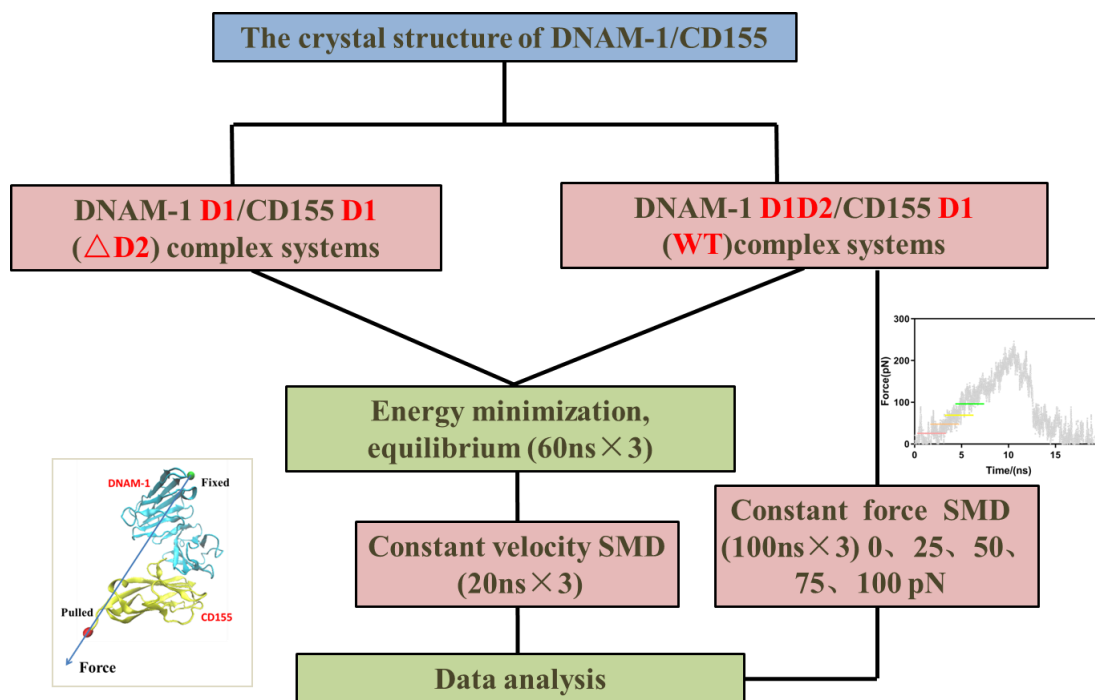

Figure S1. The ensemble workflow of computational procedure.

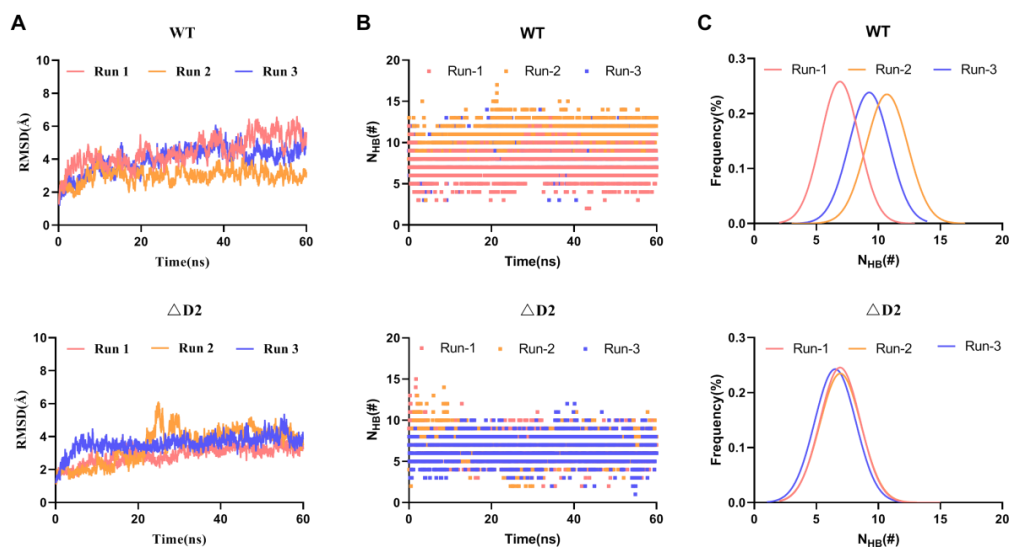

**Figure S2.** The time courses of root mean square deviation (RMSD) of heavy atoms and the number of H-bonds (NHB) between the interfaces, and the distributions of H-bonding events within 60 ns at binding site of the two complexes (WT and  $\Delta D2$ ) for thrice 60 ns equilibriums. (A) The time courses of RMSD, (B) the time courses of NHB, and (C) the Gaussian frequencies of NHB for three runs with the two complex.

**Table S1.** Residue interaction on binding site of DNAM-1/CD155 complex.

| No | Residue name |       | Force(pN) |           |           |           |           |
|----|--------------|-------|-----------|-----------|-----------|-----------|-----------|
|    | DNAM-1       | CD155 | 0pN       | 25pN      | 50pN      | 75pN      | 100pN     |
| 1  | T46          | Q63   | 0.85±0.02 | 0.87±0.04 | 0.89±0.02 | 0.87±0.01 | 0.83±0.06 |
| 2  | Q47          | T127  | 0.80±0.01 | 0.77±0.01 | 0.74±0.04 | 0.76±0.05 | 0.76±0.05 |
| 3  | E49          | S132  | 0.86±0.04 | 0.78±0.09 | 0.80±0.09 | 0.80±0.05 | 0.77±0.09 |
| 4  | Q115         | S74   | 0.65±0.05 | 0.60±0.09 | 0.58±0.06 | 0.58±0.04 | 0.63±0.04 |
| 5  | Q47          | S62   | 0.80±0.05 | 0.73±0.03 | 0.69±0.2  | 0.78±0.04 | 0.72±0.15 |
| 6  | R72          | E57   | 0.54±0.03 | 0.68±0.17 | 0.68±0.22 | 0.54±0.23 | 0.20±0.24 |
| 7  | S59          | R133  | 0.22±0.09 | 0.17±0.02 | 0.18±0.02 | 0.25±0.11 | 0.06±0.06 |
| 8  | Y113         | G83   | 0.52±0.06 | 0.48±0.12 | 0.40±0.09 | 0.36±0.16 | 0.41±0.03 |
| 9  | T112         | Q63   | 0.44±0.07 | 0.51±0.08 | 0.53±0.12 | 0.49±0.04 | 0.49±0.07 |
| 10 | K190         | E71   | 0.39±0.06 | 0.38±0.15 | 0.29±0.28 | 0.38±0.13 | 0.34±0.18 |
| 11 | Y111         | S132  | 0.10±0.01 | 0.15±0.14 | 0.10±0.18 | 0.25±0.02 | 0.15±0.17 |
| 12 | Q119         | E71   | 0.33±0.10 | 0.40±0.20 | 0.33±0.28 | 0.40±0.10 | 0.39±0.18 |
| 13 | R72          | P129  | 0.29±0.09 | 0.19±0.16 | 0.13±0.22 | 0.23±0.13 | 0.32±0.20 |
| 14 | R72          | Q130  | 0.11±0.06 | 0.15±0.14 | 0.11±0.19 | 0.18±0.09 | 0.31±0.13 |

**Table S2.** Residue interaction on interface of DNAM-1 D1 and D2.

| No | Residue name |      | Force(pN) |           |           |           |           |
|----|--------------|------|-----------|-----------|-----------|-----------|-----------|
|    | D1           | D2   | 0pN       | 25pN      | 50pN      | 75pN      | 100pN     |
| 1  | S26          | I173 | 0.97±0.01 | 0.95±0.04 | 0.96±0.04 | 0.98±0.00 | 0.98±0.01 |
| 2  | T25          | D174 | 0.56±0.11 | 0.57±0.08 | 0.57±0.08 | 0.54±0.04 | 0.62±0.01 |
| 3  | D128         | R221 | 0.05±0.09 | 0.83±0.20 | 0.64±0.20 | 0.91±0.01 | 0.82±0.14 |
| 4  | E36          | R171 | 0.45±0.27 | 0.65±0.15 | 0.60±0.15 | 0.58±0.13 | 0.79±0.02 |
| 5  | Q119         | K190 | 0.17±0.15 | 0.25±0.26 | 0.25±0.26 | 0.19±0.13 | 0.31±0.07 |
| 6  | H24          | L175 | 0.45±0.39 | 0.54±0.23 | 0.51±0.23 | 0.67±0.01 | 0.50±0.15 |
| 7  | H24          | K190 | 0.15±0.13 | 0.07±0.17 | 0.18±0.17 | 0.17±0.09 | 0.15±0.12 |
| 8  | E19          | R185 | 0.28±0.24 | 0.12±0.07 | 0.20±0.07 | 0.33±0.06 | 0.18±0.17 |
| 9  | K120         | D174 | 0.21±0.20 | 0.22±0.24 | 0.25±0.24 | 0.04±0.04 | 0.25±0.07 |
| 10 | E36          | Q172 | 0.35±0.29 | 0.44±0.24 | 0.55±0.24 | 0.31±0.05 | 0.33±0.09 |
| 11 | E20          | R185 | 0.27±0.17 | 0.19±0.43 | 0.30±0.43 | 0.22±0.18 | 0.16±0.14 |
